# Supplementary material for: High FODMAP diet causes barrier loss via lipopolysaccharide-mediated mast cell activation
Source: JCI journal article supplement (doi:10.1172/jci.insight.146529), 2021-10-07

**Supplemental figure 1: Effect of high FODMAP (HFM) diet on tight junction and cytokine mRNA expression in wild type mice:** Adult male C57BL/6 mice were randomized for 2 weeks to an HFM diet vs. regular chow (RC). **(A)** HFM diet caused no significant decrease in relative mRNA expression of tight junction proteins (JAM-A and Claudin-1) and **(B)** no significant difference in mRNA expression of inflammatory markers (IL-1 $\beta$ , IL-10, and TNF- $\alpha$ ) (n=8/group). P<0.05 for each using unpaired t-test

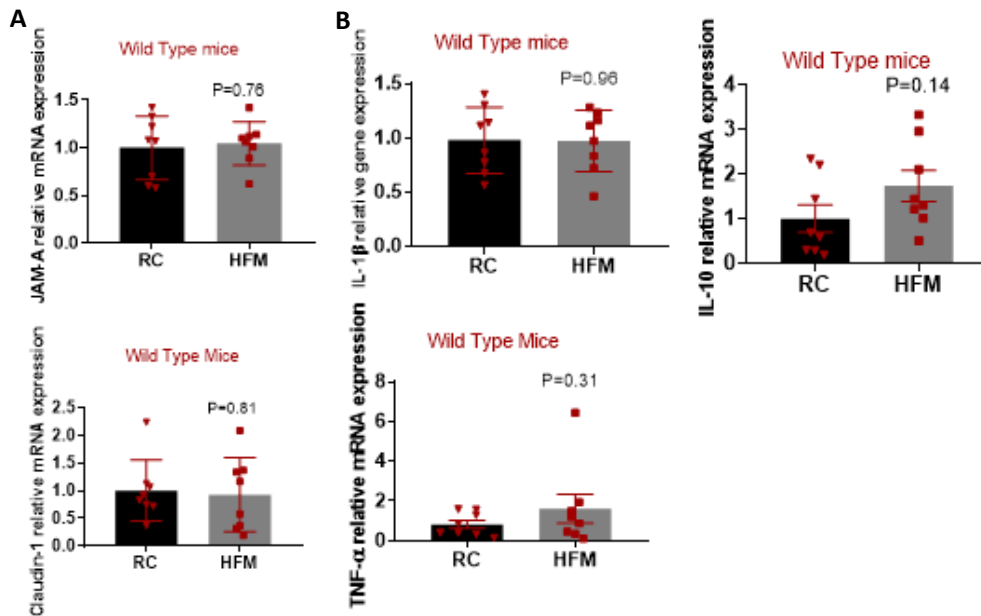

**Supplemental figure 1: Effect of high FODMAP (HFM) diet on tight junction and cytokine mRNA expression in mast cell-deficient (MCD) mice:** Adult male Mast cell deficient  $Kit^{W/W-v}$  (MCD) mice were randomized for 2 weeks to an HFM diet vs. regular chow (RC). **(A)** HFM diet caused no significant decrease in relative mRNA expression of tight junction proteins (ZO-1, Occludin, JAM-A and Claudin-1) and **(B)** no significant difference in mRNA expression of inflammatory markers (IL-1 $\beta$ , TNF- $\alpha$ , IFN- $\gamma$ , IL-4, IL-6, IL-10, and IL-17)(n=4/group).  $P < 0.05$  for each using unpaired t-test

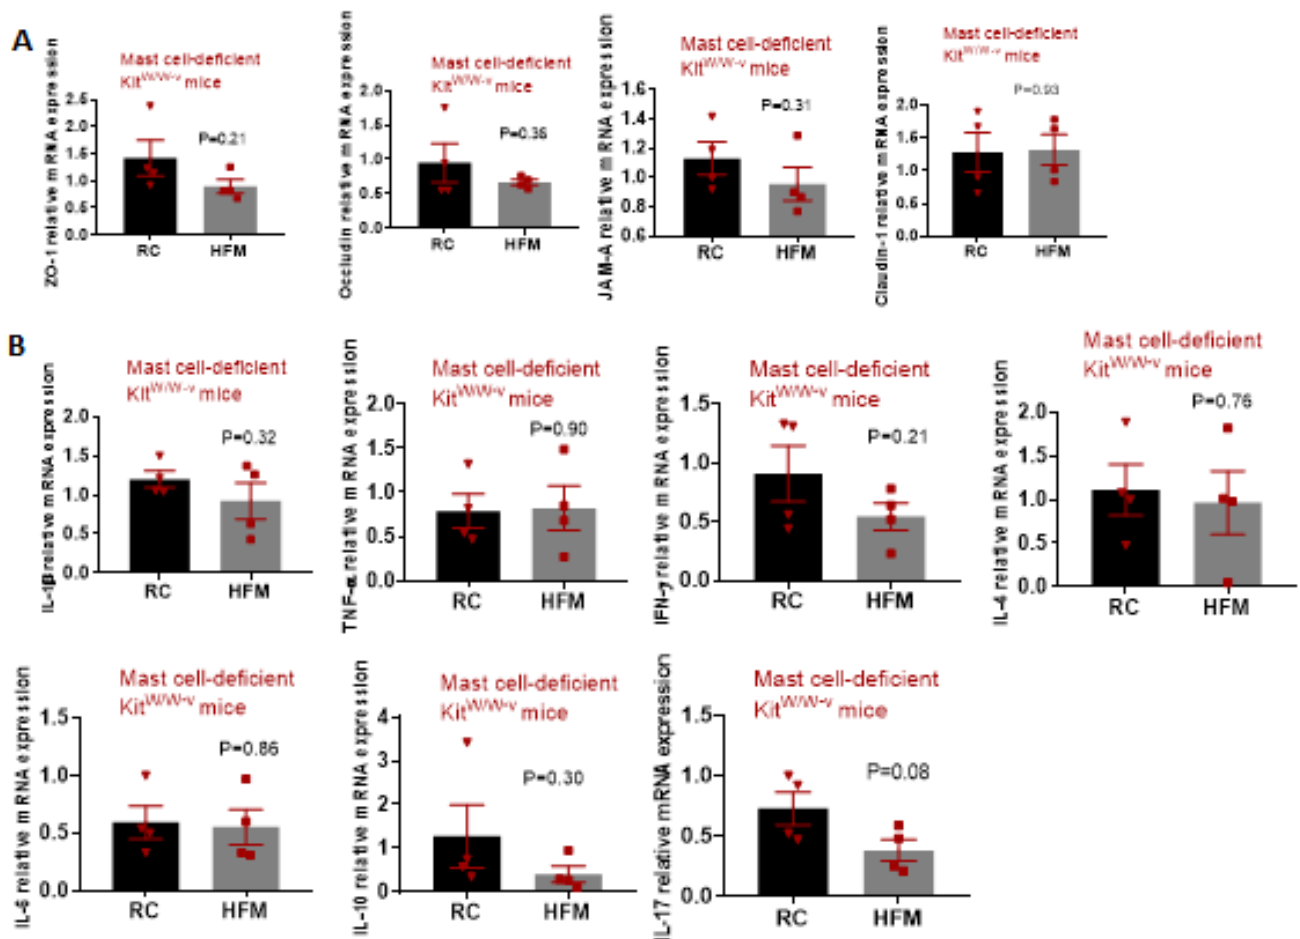

Supplement: sd1 [file 1]
